# Supplementary material
Source: PubMed Central journal article supplement (PMC3232628)
Supplement: supp_jc.2011-1549_11-1549_3xfig_5xtab.pdf [file supp_jc.2011-1549_11-1549_3xfig_5xtab.pdf]

## **Supplemental Material**

### **Supplemental References**

Chu X, Erdman R, Susek M, Gerst H, Derr K, Al-Agha M, Wood GC, Hartman C, Yeager S, Blosky MA, Krum W, Stewart WF, Carey D, Benotti P, Still CD, Gerhard GS (2008) Association of morbid obesity with FTO and INSIG2 allelic variants. *Arch Surg (United States)* 143:235-40

Gerhard GS, Langer RD, Carey DJ, Stewart WF (2010) Electronic medical records in genomic medicine practice and research. In: *Genomic and personalized medicine* (Ginsburg, GS and Willard HF, ed), pp142-151. Academic Press/Elsevier.

Supplemental Figures & Tables

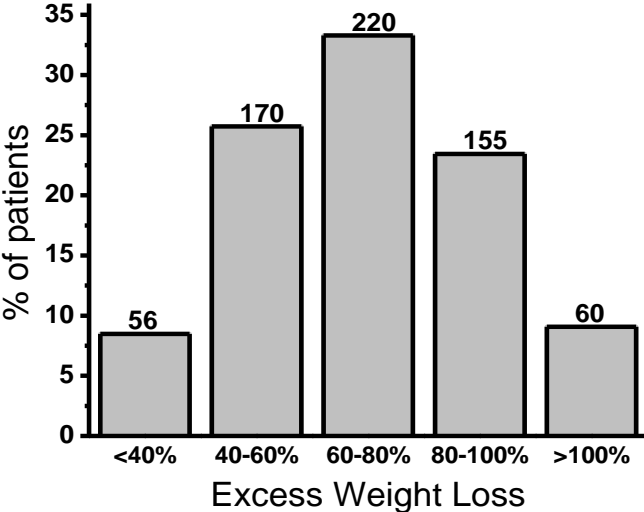

**Supplemental Figure 1.** Weight loss in RYGB patients  $24 \pm 3$  months after surgery. Number of patients in each group is indicated above the bars.

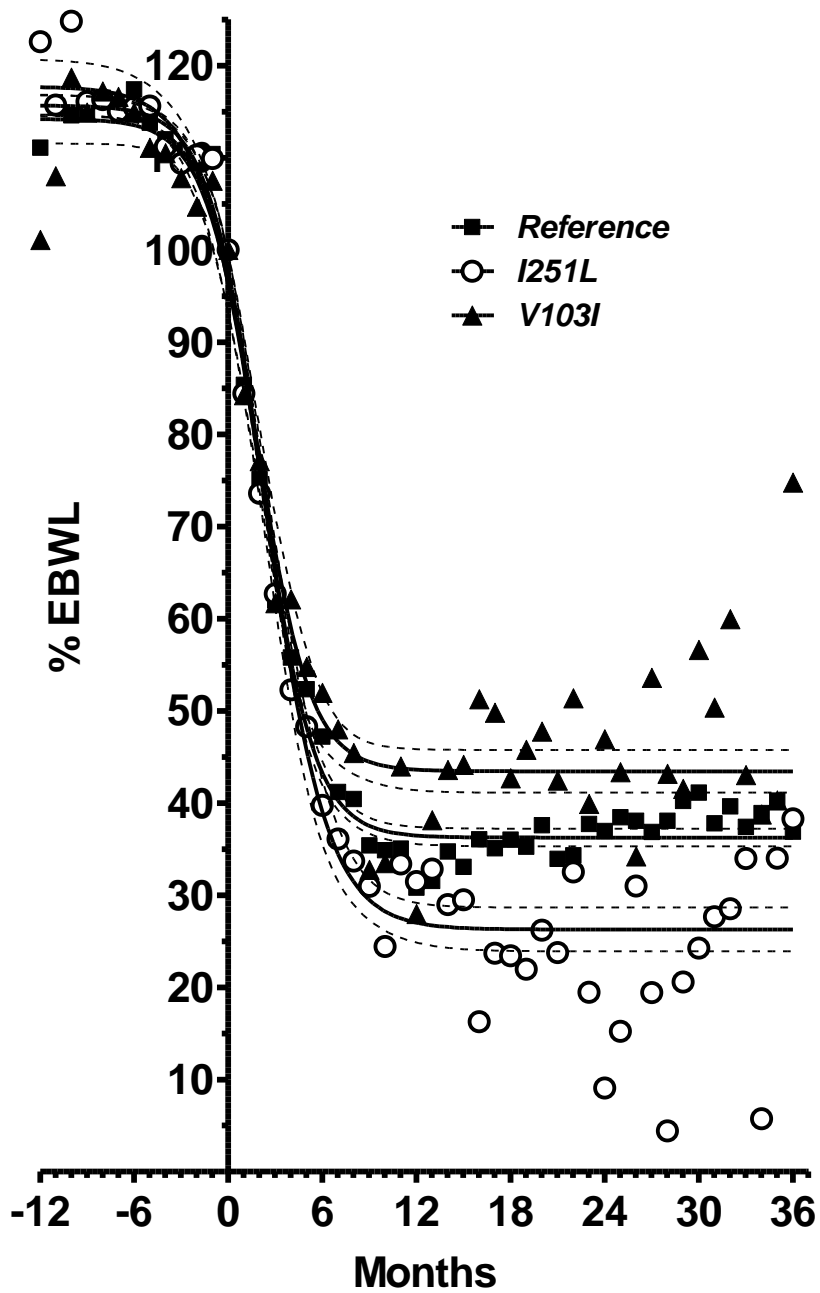

**Supplemental Figure 2.** Weight loss in patients undergoing RYGB stratified by *MC4R* genotype expressed as percent excess body weight loss (EBWL). Excess body weight is defined based an idealized BMI of 25 kg/m<sup>2</sup>.

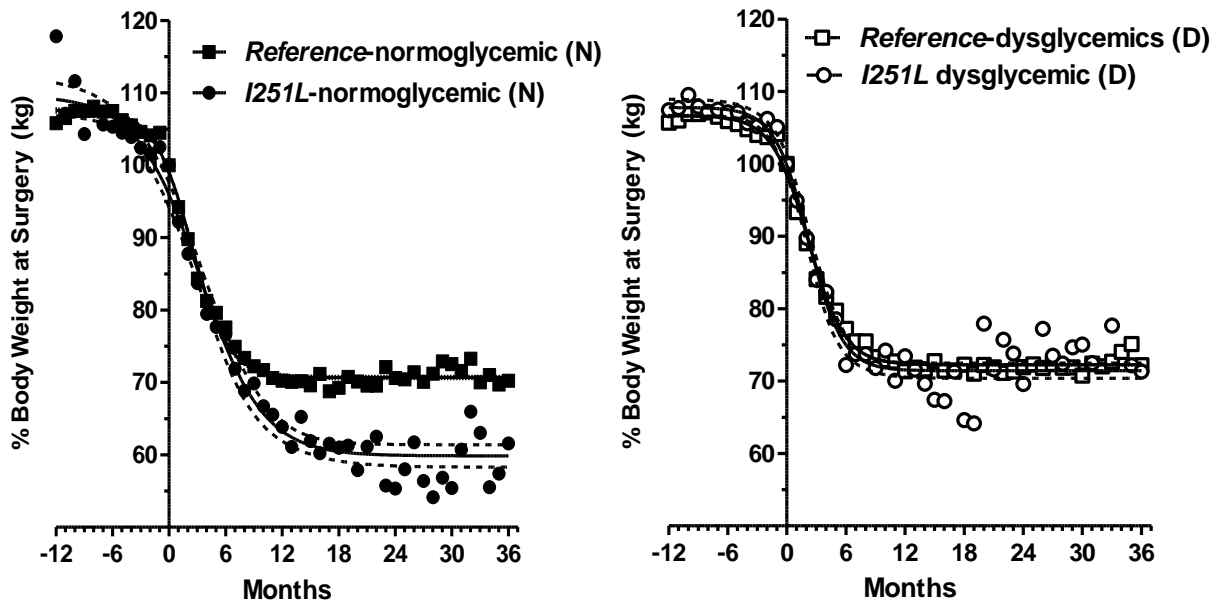

**Supplemental Figure 3. Post-RYGB weight loss stratified by diabetic status for *Reference* and *I251L* allele carriers.** Weight loss reported as %kg at surgery is shown for the two groups based on pre-surgery diabetic status.

**Supplemental Table 1.**Study cohorts (Means  $\pm$  SEM).

|                           | <b>Obese (RYGB)</b> | <b>Lean (Control)</b> |
|---------------------------|---------------------|-----------------------|
| <b>Number of subjects</b> | 1433                | 451                   |
| <b>Average BMI</b>        | 46.6 $\pm$ 0.001    | 23.1 $\pm$ 0.001      |
| <b>Average age</b>        | 45.8 $\pm$ 0.002    | 49.5 $\pm$ 0.02       |
| <b>% Female</b>           | 79.9                | 68.5                  |

**Supplemental Table 2.**

Cohort allele frequency and odd ratios (95% confidence intervals).

| <b>Genotype</b> | <b>Obese</b>   | <b>Control</b> | <b>Odd Ratios (95% CI)</b> |
|-----------------|----------------|----------------|----------------------------|
| <i>V103I</i>    | 36/1433 (2.5%) | 18/451 (4.0%)  | 0.62 (0.35-1.10)           |
| <i>I251L</i>    | 26/1433 (1.8%) | 6/451 (1.3%)   | 1.37 (0.56-3.35)           |

One of the subjects in the obese group was homozygous for V103I allele. Two-sided p values for allele frequency between the obese and control groups for V103I and I251L are 0.1 and 0.7, respectively (Fisher's exact test).

**Supplemental Table 3.**Obese cohort stratified by genotype (Means  $\pm$  SEM).

|                               | <b>Reference</b> | <b>I251L</b> | <b>V103I</b> |
|-------------------------------|------------------|--------------|--------------|
| <b>Subjects (n)</b>           | 1353             | 26           | 36           |
| <b>Female (n)</b>             | 1077             | 23           | 28           |
| <b>Age (years)</b>            | 46 $\pm$ 0.3     | 47 $\pm$ 2   | 46 $\pm$ 2   |
| <b>BMI (kg/m<sup>2</sup>)</b> | 47 $\pm$ 0.2     | 47 $\pm$ 2   | 48 $\pm$ 2   |
| <b>Ethnicity (n)</b>          |                  |              |              |
| White/Caucasian               | 1283             | 26           | 32           |
| Black/African-American        | 27               |              | 1            |
| Hispanics                     | 12               |              |              |
| Other                         | 1                |              |              |
| Data not collected            | 33               |              | 3            |

**Supplement Table 4.**

Diabetic status of study cohort

|                                   | <b>Reference</b> | <b>I251L</b> |
|-----------------------------------|------------------|--------------|
| Total (n)                         | 1269             | 25           |
| Dysglycemics <sup>§</sup> , n (%) | 776 (62)         | 14 (56)      |

<sup>§</sup> Dysglycemics (Diabetics and pre-diabetics) were identified as those with Hb<sub>A1c</sub>  $\geq$  6.0 or taking therapy (biguanides, insulin, insulin-sensitizing agents, sulfonylureas) at time of surgery.

**Supplemental Table 5.**Additional Clinical Parameters at Time of Surgery: Mean  $\pm$  SEM (n)

|                                |                            | <i>Reference</i>                       | <i>I251L</i>                          | <b>P value<sup>¥</sup></b> |
|--------------------------------|----------------------------|----------------------------------------|---------------------------------------|----------------------------|
| ALT (units/L)                  | <b>Total</b>               | <b>31 <math>\pm</math> 0.7 (810)</b>   | <b>23 <math>\pm</math> 2 (19) **</b>  | <b>0.001</b>               |
|                                | Normoglycemic <sup>§</sup> | 29 $\pm$ 0.7 (500)                     | 23 $\pm$ 3 (12)                       | 0.2                        |
|                                | Dysglycemic <sup>§</sup>   | 33 $\pm$ 1 (310) ##                    | 23 $\pm$ 1 (7) ***                    | 0.0001                     |
| AST (units/L)                  | <b>Total</b>               | <b>26 <math>\pm</math> 1 (808)</b>     | <b>22 <math>\pm</math> 1 (19) ***</b> | <b>0.0005</b>              |
|                                | Normoglycemic              | 25 $\pm$ 1 (498)                       | 21 $\pm$ 2 (12)                       | 0.05                       |
|                                | Dysglycemic                | 29 $\pm$ 1 (310) ##                    | 22 $\pm$ 1 (7) ***                    | 0.0002                     |
| Alkaline Phosphatase (units/L) | <b>Total</b>               | <b>79 <math>\pm</math> 1 (809)</b>     | <b>84 <math>\pm</math> 5 (19)</b>     | 0.3                        |
|                                | Normoglycemic              | 78 $\pm$ 1 (499)                       | 85 $\pm$ 7 (12)                       | 0.2                        |
|                                | Dysglycemic                | 80 $\pm$ 2 (310)                       | 82 $\pm$ 7 (7)                        | 0.8                        |
| Triglyc. (mg/dL)               | <b>Total</b>               | <b>168 <math>\pm</math> 3 (811)</b>    | <b>148 <math>\pm</math> 12 (19)</b>   | <b>0.2</b>                 |
|                                | Normoglycemic              | 153 $\pm$ 4 (499)                      | 138 $\pm$ 12 (12)                     | 0.2                        |
|                                | Dysglycemic                | 191 $\pm$ 7 (312) ###                  | 167 $\pm$ 29 (7)                      | 0.6                        |
| Chol. (mg/dL)                  | <b>Total</b>               | <b>190 <math>\pm</math> 1 (813)</b>    | <b>202 <math>\pm</math> 7 (19)</b>    | <b>0.2</b>                 |
|                                | Normoglycemic              | 190 $\pm$ 2 (499)                      | 201 $\pm$ 9 (12)                      | 0.3                        |
|                                | Dysglycemic                | 191 $\pm$ 2 (314)                      | 205 $\pm$ 12 (7)                      | 0.3                        |
| LDL (mg/dL)                    | <b>Total</b>               | <b>110 <math>\pm</math> 1 (802)</b>    | <b>123 <math>\pm</math> 8 (19)</b>    | <b>0.07</b>                |
|                                | Normoglycemic              | 112 $\pm$ 1 (495)                      | 123 $\pm$ 10 (12)                     | 0.2                        |
|                                | Dysglycemic                | 108 $\pm$ 2 (307) #                    | 124 $\pm$ 15 (7)                      | 0.2                        |
| HDL (mg/dL)                    | <b>Total</b>               | <b>47 <math>\pm</math> 0.4 (811)</b>   | <b>49 <math>\pm</math> 3 (19)</b>     | <b>0.5</b>                 |
|                                | Normoglycemic              | 48 $\pm$ 0.5 (499)                     | 50 $\pm$ 4 (12)                       | 0.4                        |
|                                | Dysglycemic                | 47 $\pm$ 0.7 (312)                     | 48 $\pm$ 5 (7)                        | 0.7                        |
| Chol/HDL ratio                 | <b>Total</b>               | <b>4.3 <math>\pm</math> 0.08 (811)</b> | <b>4.4 <math>\pm</math> 0.3 (19)</b>  | <b>0.8</b>                 |
|                                | Normoglycemic              | 4.3 $\pm$ 0.12 (499)                   | 4.2 $\pm$ 0.3 (12)                    | 0.9                        |
|                                | Dysglycemic                | 4.3 $\pm$ 0.07 (312)                   | 4.5 $\pm$ 0.4 (7)                     | 0.6                        |

<sup>§</sup> Dysglycemics (diabetics and pre-diabetics) were identified as described in Supplemental Table 4 above.

Subjects taking cholesterol absorption medicines (statins) were excluded from these calculations.

<sup>¥</sup> p values from unpaired t-test between genotypes using Welch's correction for unequal variances whenever necessary, \*\*\* p<0.001 vs. corresponding *Reference* genotype.

Unpaired t-test with Welch's corrections for unequal variances whenever necessary was used to compare within genotype between dysglycemic and normoglycemic groups, #p < 0.05, ### p<0.001 vs. non-diabetic group of the same genotype.
